# Supplementary material for: A Gene-Phenotype Network Based on Genetic Variability for Drought Responses Reveals Key Physiological Processes in Controlled and Natural Environments
Source: PLoS One. 2012 Oct 8;7(10):e45249. doi: 10.1371/journal.pone.0045249 (PMC3466295; doi:10.1371/journal.pone.0045249)
Supplement: Table S3 — Numbers of transcripts associated to the different phenotypic varibles in the Gene-Phenotype network obtained through the sPLS analysis. (XLS) [file pone.0045249.s008.xls]

## Sheet: Feuil1
		FDS									FIS									BOTH
		RWC	LMA	OP	ET	PHe	ITW				RWC	LMA	OP	ET	PHe	ITW				RWC	LMA	OP	ET	PHe	ITW
FDS	RWC	9	0	0	1	0	0		FDS	RWC	0	0	0	0	0	1		FDS	RWC	0	0	0	0	0	0
	LMA	0	38	13	12	0	4			LMA	18	0	1	4	0	6			LMA	0	0	22	4	0	22
	OP	0	13	452	154	0	34			OP	181	0	0	34	0	156			OP	8	0	0	6	0	102
	ET	1	12	154	278	0	31			ET	162	0	1	0	0	97			ET	7	0	60	0	0	108
	PHe	0	0	0	0	6	0			PHe	0	0	0	0	0	0			PHe	0	0	0	0	0	0
	ITW	0	4	34	31	0	38			ITW	0	0	0	0	0	0			ITW	0	0	4	0	0	0
FIS	RWC	0	18	181	162	0	0		FIS	RWC	503	0	12	86	0	362		FIS	RWC	0		77	92	0	138
	LMA	0	0	0	0	0	0			LMA	0	0	0	0	0	0			LMA	0	0	0	0	0	0
	OP	0	1	0	1	0	0			OP	12	0	52	2	0	24			OP	0	0	0	0	0	0
	ET	0	4	34	0	0	0			ET	86	0	2	227	0	184			ET	0	0	7	0	0	5
	PHe	0	0	0	0	0	0			PHe	0	0	0	0	24	0			PHe	0	0	0	0	0	0
	ITW	1	6	156	97	0	0			ITW	362	0	24	184	0	746			ITW	6	0	34	59	0	0
BOTH	RWC	0	0	8	7	0	0		BOTH	RWC	0	0	0	0	0	6		BOTH	RWC	11	0	1	3	0	5
	LMA	0	0	0	0	0	0			LMA	0	0	0	0	0	0			LMA	0	0	0	0		0
	OP	0	22	0	60	0	4			OP	77	0	0	7	0	34			OP	1	0	124	12	0	68
	ET	0	4	66	0	0	0			ET	92	0	0	0	0	59			ET	3	0	12	110	0	50
	PHe	0	0	0	0	0	0			PHe	0	0	0	0	0	0			PHe	0	0	0	0	0	0
	ITW	0	22	102	108	0	0			ITW	138	0	0	5	0	0			ITW	5	0	68	50	0	170
Summary	Not linked	223	222	40	164	225	197		Summary	Not linked	385	572	522	386	548	91		Summary	Not linked	131	430	72	97	459	21
	FDS	8	9	191	67	6	34			FDS	0	0	0	0	0	0			FDS	1	29	261	211	0	4
	FIS	0	0	0	0	0	0			FIS	187	0	50	186	24	481			FIS	316	0	2	41	0	264
	BOTH	0	0	0	0	0	0			BOTH	0	0	0	0	0	0			BOTH	11	0	124	110	0	170
